# Supplementary material
Source: publisher figshare collection journal article supplement (https://springernature.figshare.com/ndownloader/files/20017310)
Supplement: Supplementary file [file 20017310]

**Table S2.** Radiosensitivity parameters describing survival advantage of isogenic head and neck SCC cells with different radiosensitivity.

| Cells   | SF2 <sup>1</sup> | ED <sub>50</sub> <sup>2</sup> (DMF <sup>3</sup> ) | D <sub>10</sub> <sup>4</sup> (DMF) | α <sup>5</sup> | β <sup>6</sup> | α/β <sup>7</sup> |
|---------|------------------|---------------------------------------------------|------------------------------------|----------------|----------------|------------------|
| FaDu    | 0.42 ± 0.02      | 1.60 ± 0.11 (/)                                   | 4.15 ± 0.13 (/)                    | 0.34 ± 0.04    | 0.05 ± 0.004   | 7.8 ± 1.2        |
| FaDu-R1 | 0.59 ± 0.03*     | 2.28 ± 0.10 (1.4)                                 | 4.92 ± 0.16 (1.2)                  | 0.13 ± 0.05*   | 0.07 ± 0.01    | 2.6 ± 1.5        |
| FaDu-R2 | 0.60 ± 0.04*     | 2.44 ± 0.15* (1.5)                                | 4.99 ± 0.24 (1.2)                  | 0.13 ± 0.03*   | 0.06 ± 0.008   | 2.1 ± 0.4        |
| FaDu-RR | 0.67 ± 0.02**    | 2.57 ± 0.09** (1.6)                               | 5.34 ± 0.11** (1.3)                | 0.06 ± 0.01**  | 0.07 ± 0.003   | 0.8 ± 0.2**      |
| 2A3     | 0.38 ± 0.09      | 1.17 ± 0.18‡ (0.7)                                | 4.07 ± 0.35 (1.0)                  | 0.51 ± 0.10‡   | 0.05 ± 0.02    | 20.3 ± 7.8‡      |

<sup>1</sup> SF2 – surviving fraction at 2 Gy; <sup>2</sup> ED<sub>50</sub> – effective dose (Gy) killing 50% of the cells; <sup>3</sup> DMF – dose-modifying factor; <sup>4</sup> D<sub>10</sub> – dose (Gy) required to kill 90% of the cells; <sup>5</sup> α – linear coefficient (Gy<sup>-1</sup>) from the LQ model; <sup>6</sup> β – quadratic coefficient (Gy<sup>-2</sup>) from the linear-quadratic model; <sup>7</sup> α/β – dose (Gy) at which linear contribution to damage equals the quadratic contribution; values are mean ± SEM from at least three independent experiments; \* indicates significant difference compared to FaDu cells; \*\* indicates significant difference compared to FaDu and 2A3 cells; ‡ indicates significant difference compared to FaDu and FaDu-RR cells (P < 0.05)
